# Supplementary material for: Insights into the Australian mid-Holocene climate using downscaled climate models
Source: Copernicus journal article supplement (doi:10.5194/cp-20-2309-2024), 2024-10-14
Supplement: Supplementary file 1 [file cp-20-2309-2024-supplement.pdf]

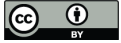

*Supplement of*

## **Insights into the Australian mid-Holocene climate using downscaled climate models**

**Andrew L. Lowry and Hamish A. McGowan**

*Correspondence to:* Andrew L. Lowry ([andrew.lowry@uq.net.au](mailto:andrew.lowry@uq.net.au))

The copyright of individual parts of the supplement might differ from the article licence.

## Supplement

**Table S1. Vegetation mapping between the USGS classification used in WRF to the BIOME classification used in Allen et al. (2020).**

| USGS Category |                                              | Allen et al. (2020) BIOME |                                          |
|---------------|----------------------------------------------|---------------------------|------------------------------------------|
| Code          | Description                                  | Code                      | Description                              |
| Urb           | Urban and Built-up Land                      |                           |                                          |
| DryCp         | Dryland Cropland and Pasture                 |                           |                                          |
| IrrCp         | Irrigated Cropland and Pasture               |                           |                                          |
| MxCp          | Mixed Dryland/Irrigated Cropland and Pasture |                           |                                          |
| CpGr          | Cropland/Grassland Mosaic                    |                           |                                          |
| CpWd          | Cropland/Woodland Mosaic                     |                           |                                          |
| Gr            | Grassland                                    | St                        | Steppe                                   |
|               |                                              | TrG                       | Tropical Grassland                       |
| Sh            | Shrubland                                    | TeSh                      | Temperate Shrubland                      |
|               |                                              | TePk                      | Temperate Parkland                       |
| MxShGr        | Mixed Shrubland/Grassland                    | Se-des                    | Semi-desert                              |
| Sav           | Savannah                                     | WTeWo                     | Warm Temperate Woodland                  |
|               |                                              | Sav                       | Savannah                                 |
|               |                                              | TrRF                      | Tropical Raingreen Forest                |
| BLDF          | Deciduous Broadleaf Forest                   | BSBF                      | Boreal Summergreen Broad-leaved Forest   |
|               |                                              | TeSF                      | Temperate Summergreen Forest             |
| NLDF          | Deciduous Needleleaf Forest                  | BSNF                      | Boreal Summergreen Needle-leaved Forest  |
| BLEvF         | Evergreen Broadleaf Forest                   | TeBEF                     | Temperate Broad-leaved Evergreen Forest  |
|               |                                              | TrEF                      | Tropical Evergreen Forest                |
| NLEvF         | Evergreen Needleleaf Forest                  | BENF                      | Boreal Evergreen Needle-leaved Forest    |
|               |                                              | TeNEF                     | Temperate Needle-leaved Evergreen Forest |
| MxF           | Mixed Forest                                 | TeMxF                     | Temperate Mixed Forest                   |
|               |                                              | BPk                       | Boreal Parkland                          |
|               |                                              |                           |                                          |
| Wat           | Water Bodies                                 | OL                        | Ocean or Lake                            |
| HWet          | Herbaceous Wetland                           |                           |                                          |
| WdWet         | Wooden Wetland                               |                           |                                          |
| Bar           | Barren or Sparsely Vegetated                 | Des                       | Desert                                   |
| HTun          | Herbaceous Tundra                            |                           |                                          |
| WdTun         | Wooded Tundra                                | BWo                       | Boreal Woodland                          |
| MxTun         | Mixed Tundra                                 | ShT                       | Shrub Tundra                             |
| BGTun         | Bare Ground Tundra                           | Tun                       | Tundra                                   |
| SnIc          | Snow or Ice                                  | ICE                       | Ice Sheet                                |
| Lake          | Lakes                                        | OL                        | Ocean or Lake                            |

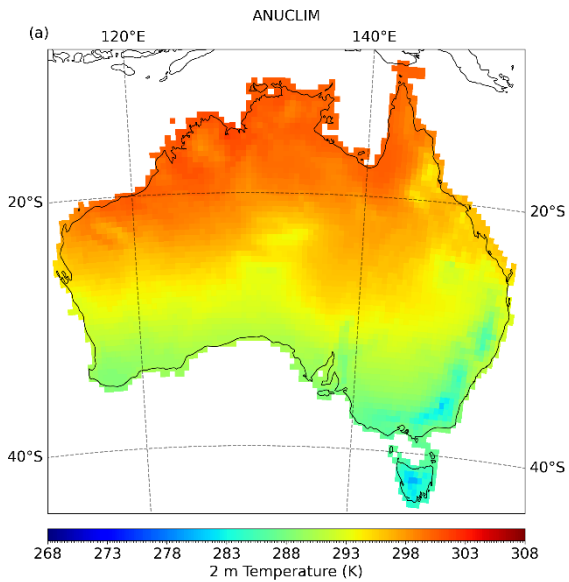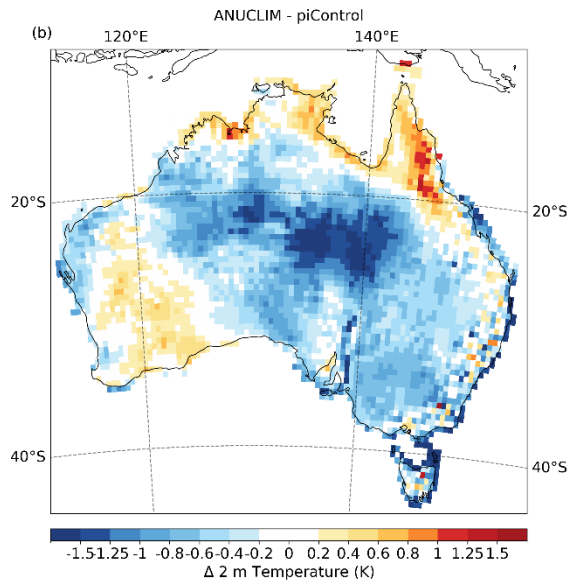

5

Figure S1. Annual temperature values from the ANUCLIM data set (Xu and Hutchinson, 2011) for 1970–1999 (a) and the difference between ANUCLIM and the WRF pre-industrial simulation (b).

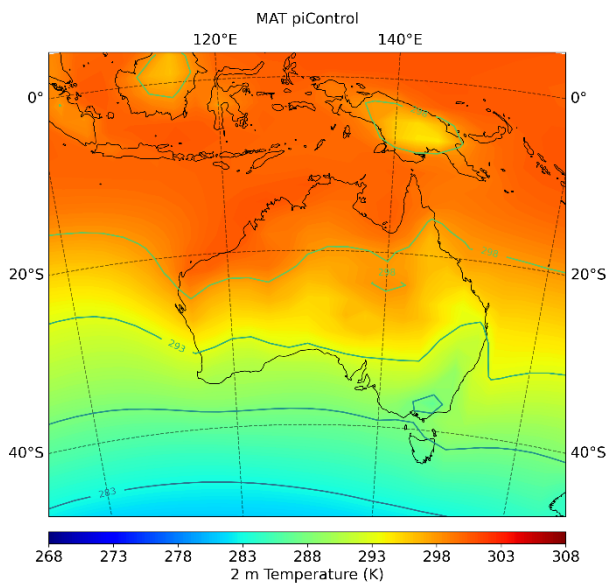

10 Figure S2. The 2 m temperature values for the CESM pre-industrial simulation.

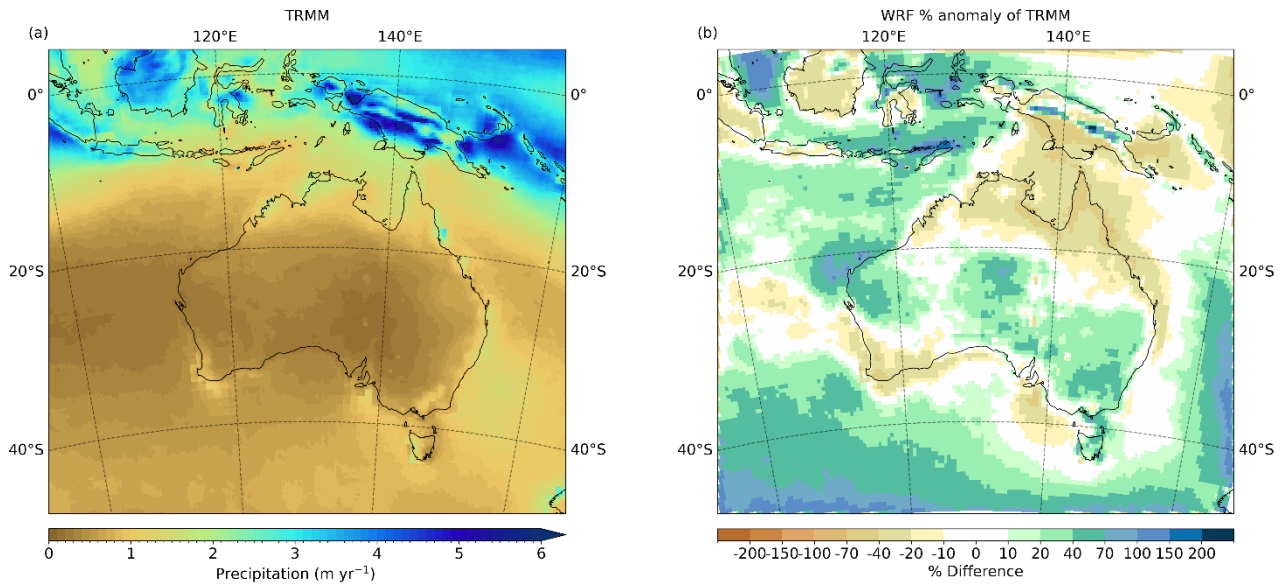

**Figure S3.** Annual precipitation values from the Tropical Rainfall Measuring Mission (TRMM) for 1998–2019 (a) and the difference between the WRF pre-industrial simulation and TRMM given as a percentage of TRMM precipitation (b).

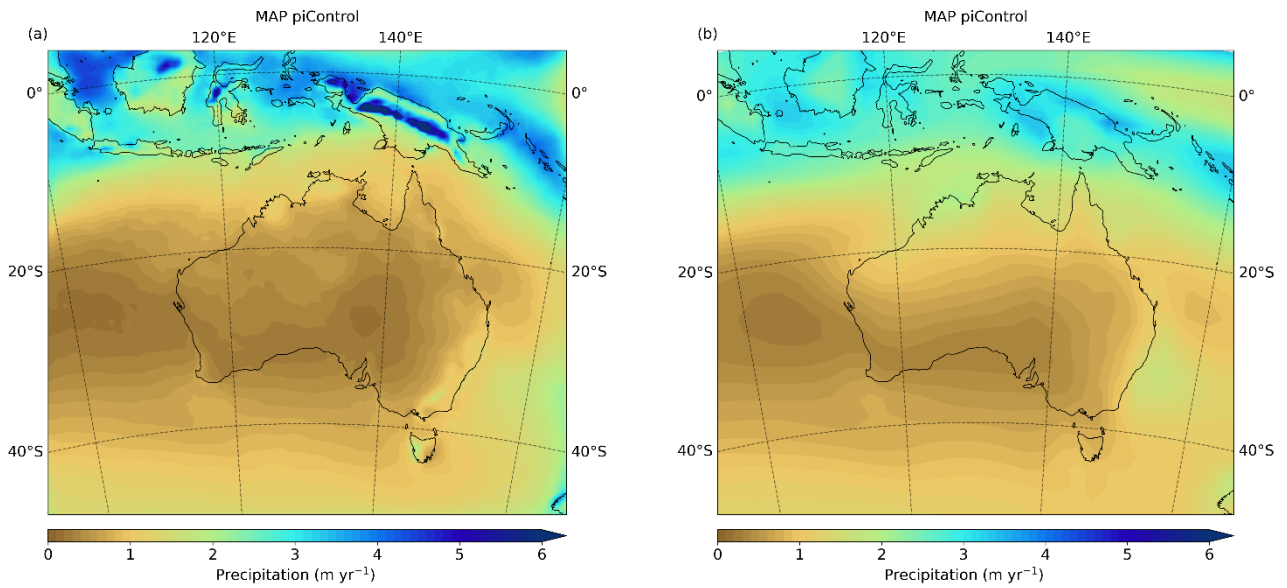

**Figure S4.** Annual precipitation from the WRF pre-industrial simulation (a) and the CESM pre-industrial simulation (b).

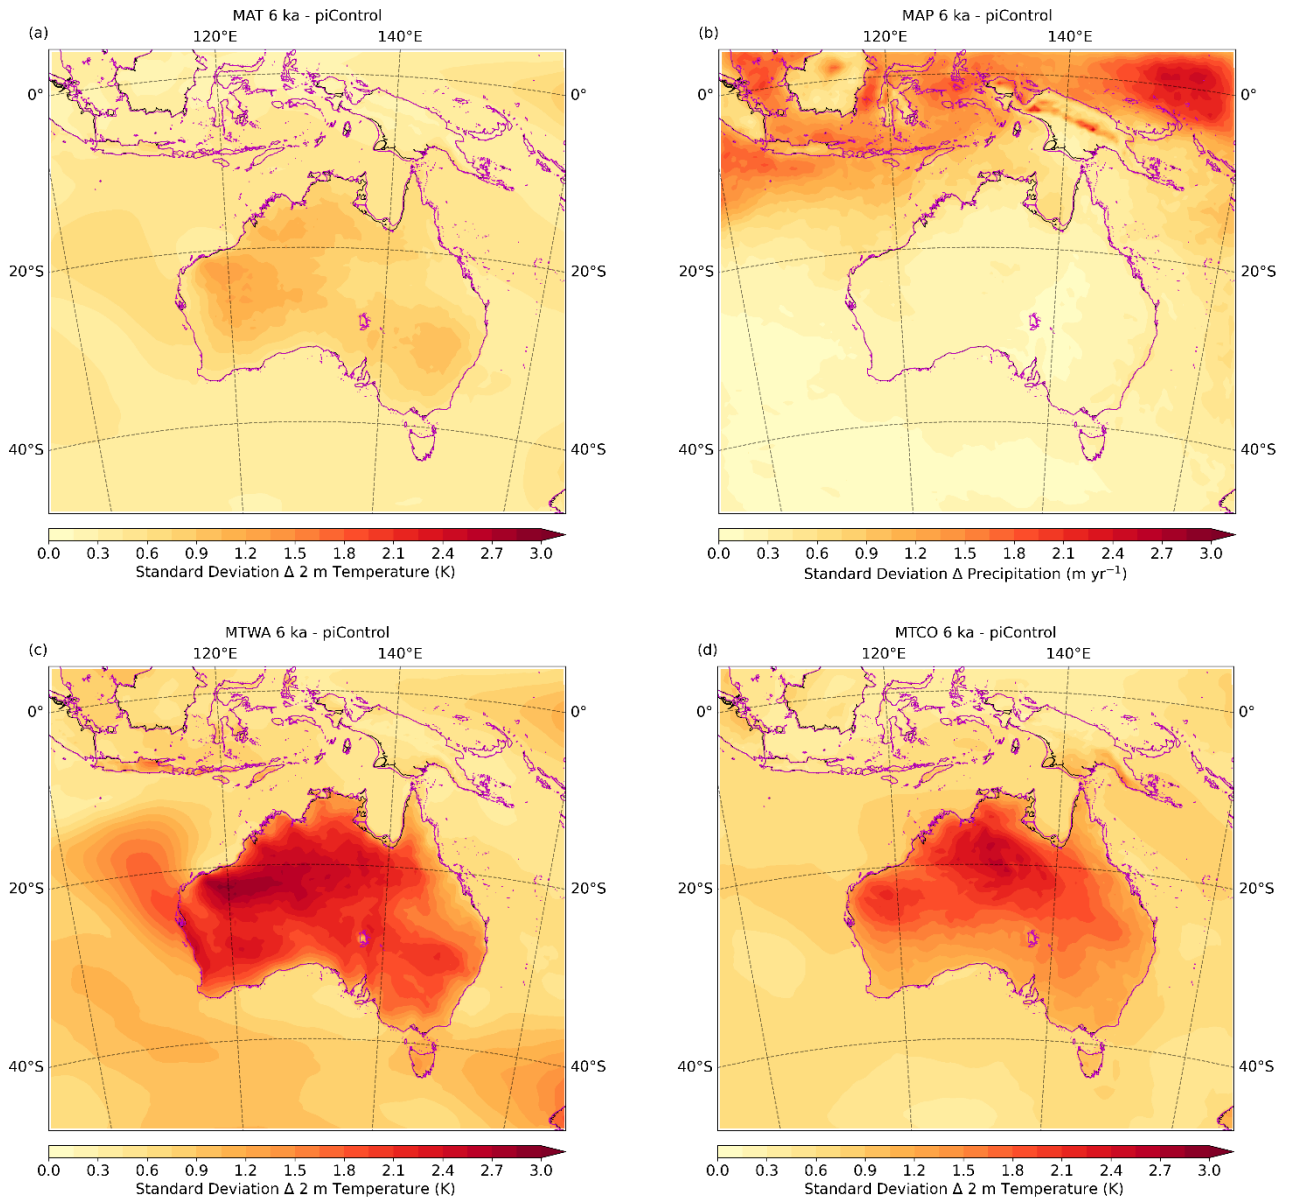

20 **Figure S5. The inter-year spread (given as the standard deviation) from the WRF simulations in annual temperature (a), annual precipitation (b), MTWA (c), and MTCO (d). The purple line is the coastline in the mid-Holocene.**

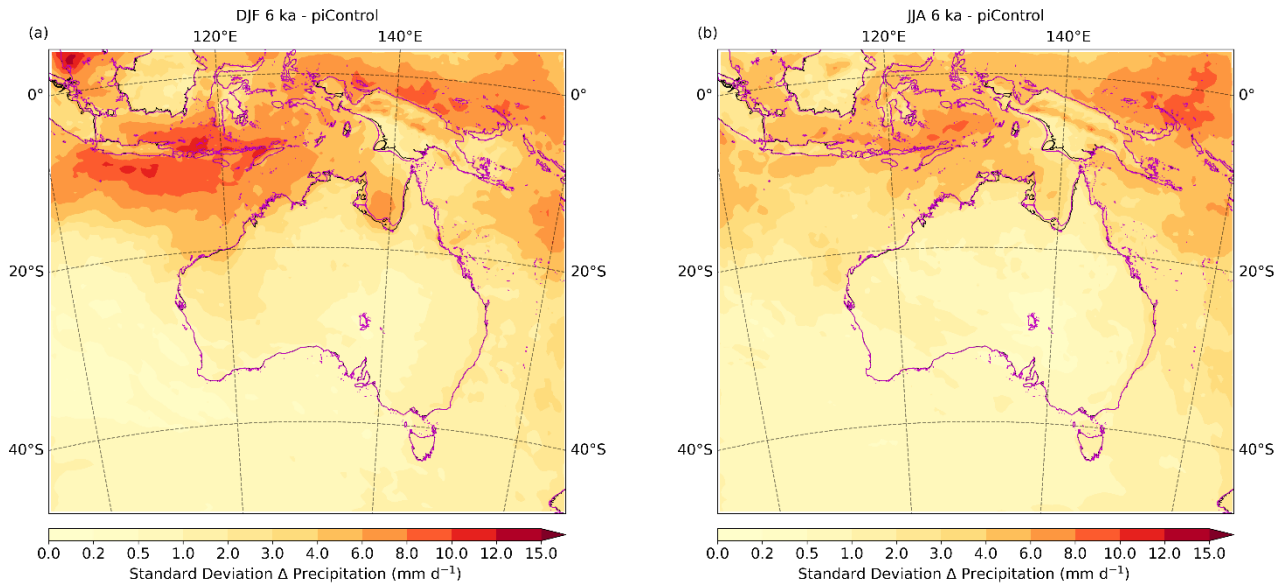

**Figure S6.** The standard deviation from the WRF simulations of precipitation for December, January, and February (a), and June, July, and August (b). The purple line is the coastline in the mid-Holocene. Note the different units from compared to Fig. S5b.

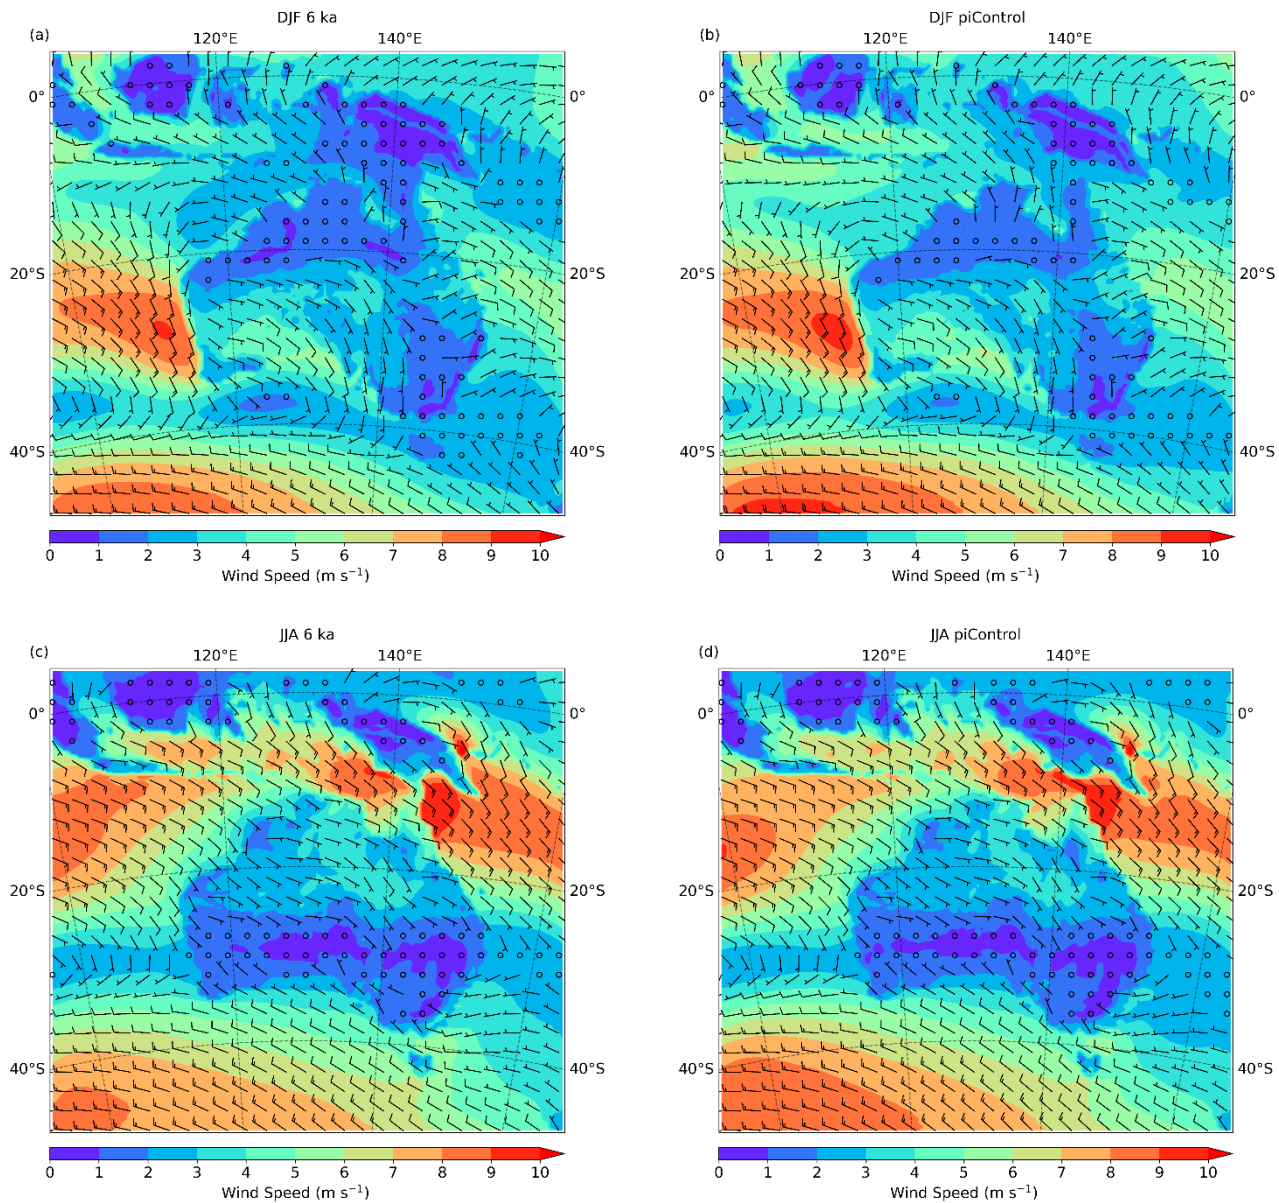

**Figure S7: Seasonal 10 m wind barbs from the WRF simulations for December, January, and February mid-Holocene (a), December, January, and February pre-industrial (b), June, July, and August mid-Holocene (c), and June, July, and August pre-industrial (d).**

30

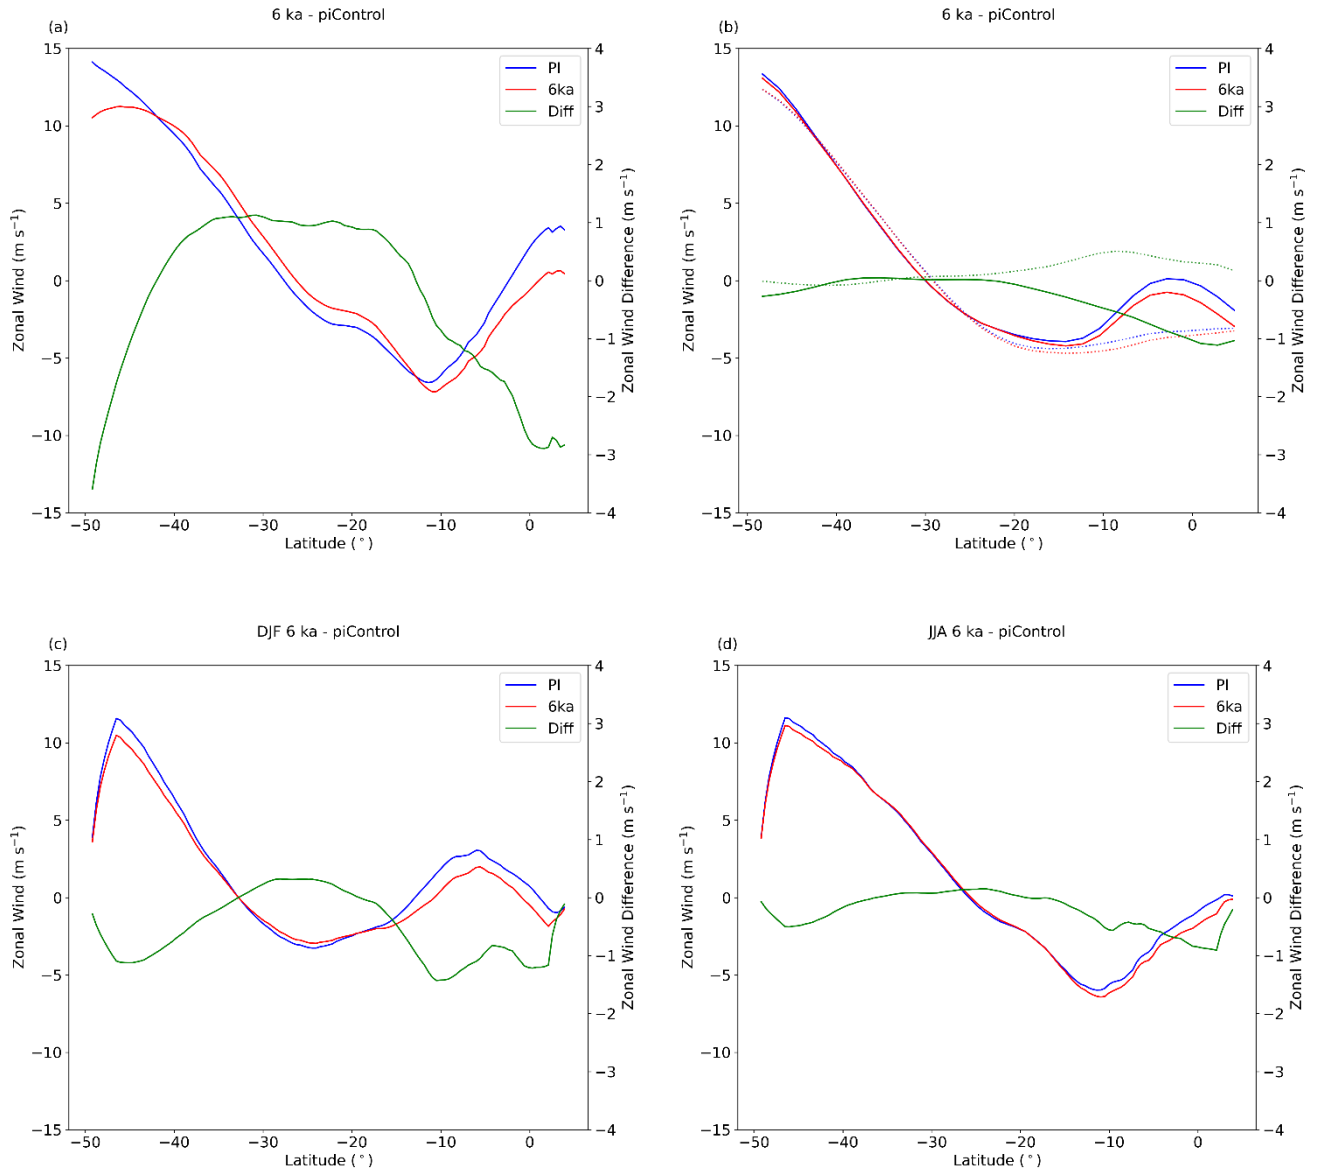

Figure S8. 850 hPa zonal wind for the pre-industrial and mid-Holocene. The annual mean from the WRF simulations (a). The annual mean from the CESM simulations, the solid lines are the Australian domain (100°E–170°E) and the dotted lines are the global values (b). The December, January, and February mean from the WRF simulations (c). The June, July, and August mean from the WRF simulations (d).

35



40 Table S2. MTWA (°C) difference between the mid-Holocene and pre-industrial from the pollen proxy dataset, WRF, and CESM simulations re-gridded to 2°. The proxy standard error (SE) is the pooled standard error (Herbert and Harrison, 2016).

| Latitude (°) | Longitude (°) | Proxy $\pm$ SE   | WRF   | CESM  |
|--------------|---------------|------------------|-------|-------|
| -43          | 145           | -0.22 $\pm$ 2.33 | 0.56  | 0.64  |
| -43          | 147           | -0.88 $\pm$ 2.65 | 0.42  | 0.50  |
| -43          | 149           | 4.49 $\pm$ 2.83  | 0.50  | 0.46  |
| -41          | 145           | 2.53 $\pm$ 2.44  | 0.40  | 0.41  |
| -41          | 147           | 9.90 $\pm$ 3.72  | 0.16  | 0.21  |
| -39          | 141           | 0.88 $\pm$ 2.54  | 0.23  | 0.45  |
| -39          | 143           | -0.14 $\pm$ 2.56 | 0.22  | 0.38  |
| -39          | 145           | 1.09 $\pm$ 2.62  | 0.13  | 0.19  |
| -39          | 147           | 3.29 $\pm$ 3.30  | -0.03 | -0.04 |
| -37          | 141           | -0.95 $\pm$ 2.31 | 0.04  | 0.02  |
| -37          | 143           | 0.45 $\pm$ 2.77  | -0.14 | -0.38 |
| -37          | 145           | -4.46 $\pm$ 2.52 | -0.14 | -0.72 |
| -37          | 147           | -2.27 $\pm$ 3.00 | -0.42 | -0.57 |
| -37          | 149           | 1.00 $\pm$ 3.04  | -0.35 | -0.34 |
| -37          | 151           | -2.32 $\pm$ 2.24 | 0.03  | -0.15 |
| -35          | 115           | -1.40 $\pm$ 5.32 | 0.14  | 0.18  |
| -35          | 117           | -1.36 $\pm$ 3.73 | 0.09  | 0.15  |
| -35          | 119           | -1.15 $\pm$ 2.53 | 0.07  | 0.13  |
| -35          | 139           | -3.16 $\pm$ 2.41 | -0.10 | -0.09 |
| -35          | 143           | -0.16 $\pm$ 2.21 | -0.37 | -0.84 |
| -35          | 149           | 1.15 $\pm$ 3.02  | -0.66 | -0.61 |
| -35          | 151           | -1.93 $\pm$ 2.31 | -0.10 | -0.34 |
| -33          | 115           | 0.56 $\pm$ 3.08  | 0.00  | -0.01 |
| -33          | 141           | -7.94 $\pm$ 2.41 | -0.54 | -0.84 |
| -33          | 151           | -3.26 $\pm$ 2.67 | -0.54 | -0.52 |
| -31          | 115           | -2.64 $\pm$ 2.78 | -0.15 | -0.28 |
| -31          | 127           | -1.97 $\pm$ 2.84 | -0.55 | -0.19 |
| -31          | 139           | -2.13 $\pm$ 2.93 | -0.77 | -0.79 |
| -31          | 143           | -1.10 $\pm$ 2.24 | -0.94 | -0.79 |
| -31          | 151           | -4.88 $\pm$ 2.92 | -0.75 | -0.55 |

|     |     |              |       |       |
|-----|-----|--------------|-------|-------|
| -27 | 153 | -1.91 ± 2.53 | -0.34 | -0.50 |
| -25 | 153 | -5.22 ± 3.29 | -0.29 | -0.34 |
| -17 | 127 | -8.28 ± 3.87 | 0.23  | 0.18  |
| -17 | 145 | -2.83 ± 3.13 | 0.12  | -0.06 |
| -17 | 147 | -2.58 ± 3.83 | 0.24  | 0.09  |
| -15 | 127 | -9.16 ± 2.43 | 0.28  | 0.40  |
| -15 | 137 | -6.10 ± 4.26 | 0.99  | 0.23  |
| -15 | 145 | 0.15 ± 2.23  | 0.29  | 0.15  |
| -13 | 137 | -2.40 ± 3.35 | 0.49  | 0.30  |
| -13 | 141 | -8.73 ± 2.74 | 0.40  | 0.30  |
| -13 | 143 | -1.30 ± 3.53 | 0.60  | 0.22  |
| -11 | 143 | -0.92 ± 2.97 | 0.55  | 0.34  |

**Table S3 MTCO (°C) difference between the mid-Holocene and pre-industrial from the pollen proxy dataset, WRF, and CESM simulations re-gridded to 2°. The proxy standard error (SE) is the pooled standard error (Herbert and Harrison, 2016).**

| Latitude (°) | Longitude (°) | Proxy ± SE   | WRF   | CESM  |
|--------------|---------------|--------------|-------|-------|
| -43          | 145           | -0.55 ± 2.82 | -0.16 | -0.16 |
| -43          | 147           | -1.42 ± 3.07 | -0.30 | -0.09 |
| -43          | 149           | 3.34 ± 2.94  | -0.04 | -0.04 |
| -41          | 145           | -0.10 ± 2.87 | -0.31 | -0.19 |
| -41          | 147           | 8.01 ± 4.90  | -0.40 | -0.16 |
| -39          | 141           | -0.49 ± 2.92 | -0.10 | -0.09 |
| -39          | 143           | -1.19 ± 3.23 | -0.13 | -0.11 |
| -39          | 145           | -0.2 ± 2.82  | -0.23 | -0.14 |
| -39          | 147           | 4.96 ± 4.19  | -0.52 | -0.17 |
| -37          | 141           | -0.53 ± 2.85 | -0.03 | -0.01 |
| -37          | 143           | 2.19 ± 3.29  | -0.05 | -0.06 |
| -37          | 145           | -3.12 ± 3.08 | -0.05 | -0.07 |
| -37          | 147           | -0.03 ± 3.63 | -0.33 | 0.02  |
| -37          | 149           | 2.41 ± 4.12  | -0.18 | 0.02  |
| -37          | 151           | -0.62 ± 2.67 | -0.07 | -0.01 |
| -35          | 115           | -2.69 ± 6.98 | -0.16 | -0.11 |
| -35          | 117           | -2.46 ± 4.94 | -0.06 | -0.06 |

|     |     |               |       |       |
|-----|-----|---------------|-------|-------|
| -35 | 119 | -2.36 ± 2.72  | -0.13 | -0.06 |
| -35 | 139 | -0.49 ± 3.42  | 0.08  | 0.02  |
| -35 | 143 | 0.02 ± 2.67   | 0.17  | 0.00  |
| -35 | 149 | 4.56 ± 4.89   | -0.20 | -0.09 |
| -35 | 151 | -1.60 ± 2.71  | -0.11 | -0.07 |
| -33 | 115 | 1.24 ± 3.84   | -0.16 | 0.02  |
| -33 | 141 | -2.25 ± 2.82  | 0.20  | 0.17  |
| -33 | 151 | -2.35 ± 3.35  | -0.08 | -0.14 |
| -31 | 115 | 0.92 ± 3.73   | -0.03 | 0.02  |
| -31 | 127 | -0.93 ± 2.83  | 0.17  | 0.17  |
| -31 | 139 | -0.05 ± 2.89  | 0.23  | 0.30  |
| -31 | 143 | 0.13 ± 3.02   | 0.12  | 0.25  |
| -31 | 151 | -2.35 ± 3.67  | -0.09 | -0.05 |
| -27 | 153 | -0.13 ± 2.92  | -0.16 | -0.04 |
| -25 | 153 | -3.15 ± 3.44  | -0.16 | -0.01 |
| -17 | 127 | -7.97 ± 4.23  | 0.62  | 0.61  |
| -17 | 145 | -3.52 ± 4.01  | -0.20 | 0.28  |
| -17 | 147 | -4.33 ± 5.14  | -0.27 | -0.02 |
| -15 | 127 | -9.92 ± 3.25  | 0.35  | 0.36  |
| -15 | 137 | -7.15 ± 5.84  | -1.18 | -0.06 |
| -15 | 145 | 0.25 ± 2.87   | -0.24 | -0.03 |
| -13 | 137 | -3.17 ± 4.03  | -0.59 | -0.16 |
| -13 | 141 | -15.71 ± 3.49 | -0.46 | -0.09 |
| -13 | 143 | -1.10 ± 5.19  | -0.08 | 0.00  |
| -11 | 143 | -1.77 ± 4.71  | -0.11 | 0.00  |

45 **Table S4. Annual precipitation (mm yr<sup>-1</sup>) difference between the mid-Holocene and pre-industrial from the pollen proxy dataset, WRF, and CESM simulations re-gridded to 2°. The proxy standard error (SE) is the pooled standard error (Herbert and Harrison, 2016).**

| Latitude (°) | Longitude (°) | Proxy ± SE      | WRF   | CESM  |
|--------------|---------------|-----------------|-------|-------|
| -43          | 145           | 33.90 ± 316.12  | 66.22 | 65.92 |
| -43          | 147           | 488.81 ± 400.77 | 67.38 | 60.04 |
| -43          | 149           | 340.52 ± 337.83 | 80.61 | 72.61 |

|     |     |                   |         |         |
|-----|-----|-------------------|---------|---------|
| -41 | 145 | -192.24 ± 362.11  | 41.45   | 30.93   |
| -41 | 147 | -134.70 ± 351.44  | 15.06   | 32.04   |
| -39 | 141 | -1.39 ± 345.53    | 10.60   | 30.90   |
| -39 | 143 | 127.76 ± 320.80   | 29.09   | 31.17   |
| -39 | 145 | -34.94 ± 332.51   | 61.13   | 21.35   |
| -39 | 147 | 648.35 ± 589.47   | 21.36   | 15.02   |
| -37 | 141 | 344.40 ± 314.35   | -18.07  | 15.47   |
| -37 | 143 | 435.95 ± 350.25   | -29.52  | 1.80    |
| -37 | 145 | 733.33 ± 310.24   | -27.23  | -16.58  |
| -37 | 147 | 347.46 ± 387.13   | -42.87  | -36.82  |
| -37 | 149 | 236.91 ± 338.02   | -30.80  | -43.34  |
| -37 | 151 | -118.95 ± 294.92  | 10.83   | -31.38  |
| -35 | 115 | 94.10 ± 405.65    | -63.02  | -25.75  |
| -35 | 117 | 360.51 ± 361.18   | -48.75  | -19.54  |
| -35 | 119 | 145.40 ± 315.22   | -27.85  | -10.35  |
| -35 | 139 | 337.95 ± 409.06   | -38.62  | -6.33   |
| -35 | 143 | -6.69 ± 294.87    | -60.56  | -37.41  |
| -35 | 149 | 218.66 ± 346.99   | 16.16   | -85.87  |
| -35 | 151 | 92.32 ± 304.07    | 24.34   | -87.94  |
| -33 | 115 | 149.26 ± 354.93   | -40.78  | -12.89  |
| -33 | 141 | 350.91 ± 300.04   | -27.81  | -48.09  |
| -33 | 151 | 329.92 ± 315.23   | 24.86   | -109.28 |
| -31 | 115 | 974.56 ± 323.65   | -37.76  | -10.04  |
| -31 | 127 | 366.88 ± 330.12   | -13.09  | 7.58    |
| -31 | 139 | 227.16 ± 334.44   | -27.88  | -47.97  |
| -31 | 143 | 9.63 ± 295.29     | -19.10  | -88.31  |
| -31 | 151 | 529.72 ± 328.49   | -52.97  | -114.56 |
| -27 | 153 | -100.25 ± 412.28  | -9.60   | -141.84 |
| -25 | 153 | -35.77 ± 320.70   | -36.36  | -135.03 |
| -17 | 127 | 105.82 ± 300.74   | -128.38 | -71.26  |
| -17 | 145 | 896.86 ± 476.20   | -193.95 | -121.25 |
| -17 | 147 | -2065.91 ± 630.63 | -137.36 | -72.54  |

|     |     |                  |         |         |
|-----|-----|------------------|---------|---------|
| -15 | 127 | 746.57 ± 357.96  | -187.28 | -39.63  |
| -15 | 137 | 298.54 ± 298.73  | -256.83 | -102.90 |
| -15 | 145 | 137.11 ± 319.76  | -169.01 | -58.75  |
| -13 | 137 | 37.03 ± 334.55   | -290.04 | -57.62  |
| -13 | 141 | -789.80 ± 330.85 | -316.59 | -65.74  |
| -13 | 143 | 8.88 ± 363.29    | -210.47 | -53.56  |
| -11 | 143 | -22.07 ± 334.56  | -132.95 | -37.33  |

50 **Table S5:  $\alpha$  difference between the mid-Holocene and pre-industrial from the pollen proxy dataset, WRF, and CESM simulations re-gridded to 2°. The proxy standard error (SE) is the pooled standard error (Herbert and Harrison, 2016). Locations where there are no WRF or CESM values were water in the PI simulation and have no output from the land component of the simulation.**

| Latitude (°) | Longitude (°) | Proxy ± SE       | WRF     | CESM    |
|--------------|---------------|------------------|---------|---------|
| -43          | 145           | 0.0000 ± 0.0971  |         |         |
| -43          | 147           | 0.0265 ± 0.1020  |         |         |
| -43          | 149           | 0.0152 ± 0.1098  |         |         |
| -41          | 145           | -0.1337 ± 0.0983 |         |         |
| -41          | 147           | -0.1781 ± 0.1527 |         | -0.0078 |
| -39          | 141           | -0.0532 ± 0.1302 |         |         |
| -39          | 143           | 0.0414 ± 0.1116  |         |         |
| -39          | 145           | -0.0495 ± 0.1451 |         |         |
| -39          | 147           | -0.0145 ± 0.1072 |         | -0.0039 |
| -37          | 141           | 0.2339 ± 0.1195  | -0.0053 | -0.0033 |
| -37          | 143           | 0.0931 ± 0.1400  | -0.0025 | -0.0069 |
| -37          | 145           | 0.2544 ± 0.1102  | -0.0106 | -0.0096 |
| -37          | 147           | 0.0650 ± 0.1290  | -0.0068 | -0.0270 |
| -37          | 149           | -0.0170 ± 0.1211 | -0.0161 |         |
| -37          | 151           | -0.1508 ± 0.0984 |         |         |
| -35          | 115           | 0.1778 ± 0.1646  |         |         |
| -35          | 117           | 0.2084 ± 0.1407  |         | -0.0086 |
| -35          | 119           | 0.1549 ± 0.1452  |         | -0.0061 |
| -35          | 139           | 0.2376 ± 0.1469  | -0.0093 | -0.0059 |
| -35          | 143           | -0.0034 ± 0.0971 | -0.0254 | -0.0173 |
| -35          | 149           | -0.0315 ± 0.1181 | -0.0045 | -0.0187 |

|     |     |                  |         |         |
|-----|-----|------------------|---------|---------|
| -35 | 151 | 0.0283 ± 0.1090  |         |         |
| -33 | 115 | 0.1347 ± 0.1438  |         |         |
| -33 | 141 | 0.5122 ± 0.1006  | -0.0046 | -0.0224 |
| -33 | 151 | 0.1332 ± 0.1018  | -0.0171 | -0.0191 |
| -31 | 115 | 0.3877 ± 0.1244  |         |         |
| -31 | 127 | 0.3249 ± 0.1703  | -0.0053 | 0.0008  |
| -31 | 139 | 0.1824 ± 0.1683  | -0.0030 | -0.0212 |
| -31 | 143 | 0.0089 ± 0.0987  | -0.0067 | -0.0341 |
| -31 | 151 | 0.2113 ± 0.1127  | -0.0213 | -0.0222 |
| -27 | 153 | -0.0817 ± 0.1585 |         |         |
| -25 | 153 | 0.0299 ± 0.1049  |         |         |
| -17 | 127 | 0.2538 ± 0.1376  | -0.0089 | 0.0005  |
| -17 | 145 | 0.2457 ± 0.1148  | -0.0246 | -0.0331 |
| -17 | 147 | -0.2435 ± 0.1209 |         |         |
| -15 | 127 | 0.3490 ± 0.1140  | 0.0002  | -0.0115 |
| -15 | 137 | 0.3037 ± 0.1560  |         |         |
| -15 | 145 | 0.0228 ± 0.1060  |         | -0.0322 |
| -13 | 137 | 0.0786 ± 0.1244  |         |         |
| -13 | 141 | 0.2548 ± 0.1142  |         | -0.1114 |
| -13 | 143 | 0.0401 ± 0.1170  | -0.0433 |         |
| -11 | 143 | 0.0486 ± 0.1153  |         |         |

## References

- Allen, J. R. M., Forrest, M., Hickler, T., Singarayer, J. S., Valdes, P. J., and Huntley, B.: Global vegetation patterns of the past 140,000 years, *J. Biogeogr.*, 47, 2073–2090, <https://doi.org/10.1111/jbi.13930>, 2020.
- 55 Herbert, A. V. and Harrison, S. P.: Evaluation of a modern-analogue methodology for reconstructing Australian palaeoclimate from pollen, *Rev. Palaeobot. Palynol.*, 226, 65–77, <https://doi.org/10.1016/j.revpalbo.2015.12.006>, 2016.
- Xu, T. and Hutchinson, M.: ANUCLIM version 6.1 user guide, Fenner School of Environment and Society, Australian National University, 90 pp., <https://fennerschool.anu.edu.au/files/anuclim61.pdf> (last access: 3 August 2021), 2011
